# Supplementary material
Source: Research Square preprint supplement (doi:10.21203/rs.3.rs-8693184/v1)
Supplement: Supplementary file 1 [file 0d35ef910c2c3fd9a575f434.docx]

**CONSORT 2025 checklist of information to include when reporting a randomised trial***

| **Section / Topic** | **No** | **CONSORT 2025 checklist item description** | **Reported on page no.** |
| --- | --- | --- | --- |
| **Title and abstract** | | |  |
| Title and structured abstract | 1a | Identification as a randomised trial | Reducing Cognitive Load and Promoting Long-Term Knowledge Retention in Regional Anatomy Education:  A Randomized Controlled Trial of Drawing and Collaborative Learning |
| 1b | Structured summary of the trial design, methods, results, and conclusions | Design: Two-cohort, parallel-group, superiority randomized controlled trial with 1:1 allocation ratio.  Methods: 200 clinical students (100 each from 2022 and 2023 cohorts) were randomly assigned to an experimental group (drawing+HQA pedagogy, n =100) or a control group (traditional lecture-dissection, n =100). The 16-week intervention covered all regional anatomy chapters. Primary outcomes included immediate performance (theory and specimen tests) and long-term knowledge retention (assessed one month post-intervention). Secondary outcomes comprised classroom participation, satisfaction, and perceived learning pressure (measured by PSS-10 scale). Data were analyzed using independent sample t -tests and χ² tests with significance set at P <0.05.  Results: Pre-trial questionnaire (n =224) identified the drawing+HQA model as easiest to understand (32.82% endorsement) and associated with lowest perceived learning pressure. In the RCT, the experimental group demonstrated significantly higher accuracy in clinical case analyses and specimen tests compared to control (P <0.05). The model also achieved significantly greater satisfaction, classroom participation, and long-term retention scores across practical, theoretical, and analytical assessments (P <0.05), with effects stable across both cohorts. [Note: The abstract should include specific values, effect sizes, and 95% confidence intervals for each outcome.]  Conclusions: The integrated drawing+HQA teaching model effectively reduces learning pressure while enhancing immediate performance, classroom engagement, and long-term knowledge retention in regional anatomy education. This provides empirically validated evidence for anatomy curriculum reform. |
| **Open science** | | |  |
| Trial registration | 2 | Name of trial registry, identifying number (with URL) and date of registration |  |
| Protocol and statistical analysis plan | 3 | Where the trial protocol and statistical analysis plan can be accessed | Research protocols are available upon request from the corresponding authors |
| Data sharing | 4 | Where and how the individual de-identified participant data (including data dictionary), statistical code and any other materials can be accessed | Individual de-identified data may be obtained from the corresponding author upon reasonable request |
| Funding and conflicts of interest | 5a | Sources of funding and other support (e.g., supply of drugs), and role of funders in the design, conduct, analysis and reporting of the trial | 2024 Project for Undergraduate Education, Teaching Research and Reform of Xinjiang Second Medical College |
| 5b | Financial and other conflicts of interest of the manuscript authors | All authors declare no conflicts of interest |
| **Introduction** | | |  |
| Background and rationale | 6 | Scientific background and rationale | Regional anatomy, as a core foundational discipline in clinical medicine, presents ongoing teaching challenges due to its complex and spatially abstract knowledge system. Traditional lecture-dissection methods often result in low student engagement, high cognitive load, and limited long-term knowledge retention.  In recent years, medical education has explored interactive, student-centered approaches. Strategies combining drawing (visualization) with structured collaborative learning (e.g., the HQA reflective tool) show promise for promoting deep understanding. However, existing research lacks systematic, empirical comparisons of how such interactive methods affect learning pressure, long-term retention, and effectiveness across different student cohorts.  Therefore, this study aims to systematically compare the comprehensive effects of four teaching methods—including "drawing + HQA" and teacher-led instruction with models/specimens—in clinical regional anatomy education. Using a randomized controlled trial, we empirically evaluate multiple dimensions: students' subjective experience (understanding, pressure), immediate and long-term academic performance (theory, practical skills, case analysis), and classroom participation. The goal is to provide scientific evidence for optimizing anatomy teaching models. |
| Objectives | 7 | Specific objectives related to benefits and harms | 1. Systematically compare the subjective evaluation differences among Classic Lecture - Cadaver Dissection Practice Teaching Method methods, Traditional - Video Hybrid Teaching Method, "drawing combined with collaborative learning" (i.e., drawing +HQA), and teacher explanation plus specimen or model guidance, understanding how students perceive the difficulty of the material, learning pressure, and satisfaction with learning experiences.  2. Empirically evaluate the teaching effectiveness of the "drawing combined with collaborative learning" (expressed as drawing +HQA in subsequent content) teaching method compared to Classic Lecture - Cadaver Dissection Practice Teaching Method methods, covering immediate knowledge mastery (theoretical assessments, specimen tests) and long-term memory (practical skills, written exams, case analyses).  3. Verify the effectiveness of the "drawing combined with collaborative learning" (later expressed as drawing +HQA) teaching method in enhancing student classroom participation and the stability of effects across the 2022 and 2023 cohorts. |
| **Methods** | | |  |
| Patient and public involvement | 8 | Details of patient or public involvement in the design, conduct and reporting of the trial | We invited 5 senior anatomy teachers and 8 student representatives to participate in a focus group discussion to optimize the drawing tasks and HQA interaction rules before the trial. Their feedback was incorporated into the final intervention protocol. |
| Trial design | 9 | Description of trial design including type of trial (e.g., parallel group, crossover), allocation ratio, and framework (e.g., superiority, equivalence, non-inferiority, exploratory) | A randomized controlled trial design using "phase repeated verification" is adopted, with the specific process as follows:  1. Phase One (May 2024 — August 2025): Preliminary survey and tool preparation phase. First, design a subjective evaluation questionnaire targeting the four teaching methods (Classic Lecture - Cadaver Dissection Practice Teaching Method, Traditional - Video Hybrid Teaching Method, "drawing + HQA," teacher explanation plus specimen or model guidance), covering core dimensions such as understanding difficulty, learning pressure, and satisfaction with learning experiences, ensuring reliability and validity after expert review and revision.  2. Phase Two (2022 cohort, September 2024 — November 2025): Randomly assign 100 students into a control group (n=50) and an experimental group (n=50) using a random number table method. The control group will use Classic Lecture - Cadaver Dissection Practice Teaching Method methods, while the experimental group will use the drawing +HQA dual-driven model, with a teaching period of 16 weeks (covering all chapters of regional anatomy: head and neck, chest, abdomen, pelvis and perineum, upper limbs, lower limbs).  3. Phase Three (2023 cohort, September 2025 — November 2026): Continue using the grouping method from Phase One (randomly divided into two groups, n=50/group) and the teaching intervention plan to repeat the verification of teaching effects, reducing random errors from single trials and enhancing the reliability of research results. |
| Changes to trial protocol | 10 | Important changes to the trial after it commenced including any outcomes or analyses that were not prespecified, with reason | No significant changes |
| Trial setting | 11 | Settings (e.g., community, hospital) and locations (e.g., countries, sites) where the trial was conducted | The manuscript reports the participant type (clinical students, 100 per cohort in 2022 & 2023) and trial setting (theoretical classes + anatomy laboratories with formalin-fixed specimens, instructors with associate senior titles and ≥8 years experience). The trial was conducted at Xinjiang Second Medical College, Karamay City, China . |
| Eligibility criteria | 12a | Eligibility criteria for participants | The inclusion criteria are clearly stated: 1) Clinical medicine students who have completed core basic medical courses (physiology, pathology, systemic anatomy); 2) Currently enrolled in the regional anatomy course (2022 & 2023 cohorts); 3) Consistency in course structure (54 total hours: 18 theoretical + 36 experimental); 4) Uniform teaching syllabus and instructors (associate senior titles with ≥8 years experience). The study includes 100 students per cohort (two classes each), with baseline comparability confirmed (P>0.05). |
| 12b | If applicable, eligibility criteria for sites and for individuals delivering the interventions (e.g., surgeons, physiotherapists) | The manuscript reports intervention delivery qualifications: all instructors hold associate senior titles with ≥8 years of anatomy teaching experience. Both groups received standardized protocols, and the experimental group used a "Drawing + HQA Task Guidance Sheet" to ensure implementation fidelity. |
| Intervention and comparator | 13 | Intervention and comparator with sufficient details to allow replication. If relevant, where additional materials describing the intervention and comparator (e.g., intervention manual) can be accessed | The intervention and comparator are described in substantial detail sufficient for replication, including: Control group (18h theory: PPT lectures with specimen images; 36h lab: teams of 6 observing formalin-fixed specimens, teacher-guided Q&A without drawing/interaction). Experimental group (18h theory: teacher drawing demonstrations emphasizing structural hierarchy, after-class hand-drawn assignments + HQA three elements—Bright Gains, Exam Peers, Help Answer Questions; 36h lab: three-stage process of specimen observation, drawing practice, and HQA group interaction). A "Drawing + HQA Task Guidance Sheet" is mentioned with specific standards (≥90% structural completeness, speaking frequency ≥1 time/person/class). |
| Outcomes | 14 | Pre-specified primary and secondary outcomes, including the specific measurement variable (e.g., systolic blood pressure), analysis metric (e.g., change from baseline, final value, time to event), method of aggregation (e.g., median, proportion), and time point for each outcome | The manuscript describes six outcome measures: 1) Chapter Cognition Satisfaction Questionnaire (5-point Likert, 3 dimensions, administered once); 2) Anatomical Structure Cognition Test (practical: 50 identification tasks; theoretical: 60 MCQ, 10 fill-in, 5 short answer, 1 essay, administered post-intervention); 3) Clinical Integration Ability Assessment (5 cases, 5 dimensions, 100 points, administered post-intervention); 4) Participation Records (5-point Likert, 9 items); 5) Psychological Burden Scale (PSS-10, 5-point Likert, administered pre-and-post); and 6) Long-term Knowledge Retention (1-month post-intervention). |
| Harms | 15 | How harms were defined and assessed (e.g., systematically, non-systematically) | The manuscript reports that harms (psychological burden) were assessed using the revised PSS-10 scale with a 5-point Likert response format, administered once before and once after each phase, focusing on perceived learning pressure and emotional regulation. |
| Sample size | 16a | How sample size was determined, including all assumptions supporting the sample size calculation | Based on the previous research, the theoretical score of the experimental group was expected to be 8 points higher than that of the control group, with a common standard deviation of 12 points, α=0.05, power=0.8, 50 cases in each group, and a total of 200 cases in the two cohorts |
| 16b | Explanation of any interim analyses and stopping guidelines | No interim analysis is scheduled. |
| Randomisation: |  |  |  |
| Sequence generation | 17a | Who generated the random allocation sequence and the method used | random number table method |
| 17b | Type of randomisation and details of any restriction (e.g., stratification, blocking and block size) | The manuscript states that students were randomly assigned using a random number table method and describes a two-cohort design (2022 and 2023 cohorts). |
| Allocation concealment mechanism | 18 | Mechanism used to implement the random allocation sequence (e.g., central computer/telephone; sequentially numbered, opaque, sealed containers), describing any steps to conceal the sequence until interventions were assigned | Using anonymous surveys |
| Implementation | 19 | Whether the personnel who enrolled and those who assigned participants to the interventions had access to the random allocation sequence | The assignment was performed by an independent research assistant and the investigator was unaware of the allocation sequence |
| Blinding | 20a | Who was blinded after assignment to interventions (e.g., participants, care providers, outcome assessors, data analysts) | Blinding of students and outcome assessors |
| 20b | If blinded, how blinding was achieved and description of the similarity of interventions | Anonymous questionnaires are conducted using Questionnaire Stars |
| Statistical methods | 21a | Statistical methods used to compare groups for primary and secondary outcomes, including harms | The manuscript reports statistical methods for comparing groups: independent sample t-tests for inter-group comparisons (experimental vs control), repeated measures ANOVA for comparisons across phases/cohorts, and χ² tests for count data. A significance level of P<0.05 is specified. |
| 21b | Definition of who is included in each analysis (e.g., all randomised participants), and in which group | Conformance Set Analysis (PP) |
| 21c | How missing data were handled in the analysis | No missing data. |
| 21d | Methods for any additional analyses (e.g., subgroup and sensitivity analyses), distinguishing prespecified from post-hoc | The manuscript mentions using repeated measures ANOVA for results across phases/cohorts, indicating analyses comparing 2022 vs 2023 cohorts. |
| **Results** | | |  |
| Participant flow, including flow diagram | 22a | For each group, the numbers of participants who were randomly assigned, received intended intervention, and were analysed for the primary outcome | It is planned to assign 50 people to each group. |
| 22b | For each group, losses and exclusions after randomisation, together with reasons | Effective recovery rate 97.82%-99% |
| Recruitment | 23a | Dates defining the periods of recruitment and follow-up for outcomes of benefits and harms | September 2024 --- November 2025 |
| 23b | If relevant, why the trial ended or was stopped | Completed as scheduled without early termination |
| Intervention and comparator delivery | 24a | Intervention and comparator as they were actually administered (e.g., where appropriate, who delivered the intervention/comparator, how participants adhered, whether they were delivered as intended [fidelity]) | The experimental group completed an average of 15.5 theoretical lessons, while the control group completed 15.8 times, and the compliance > 95% |
| 24b | Concomitant care received during the trial for each group | Neither group of students received additional anatomy tutoring |
| Baseline data | 25 | A table showing baseline demographic and clinical characteristics for each group |  |
| Numbers analysed,  outcomes and estimation | 26 | For each primary and secondary outcome, by group:   - the number of participants included in the analysis - the number of participants with available data at the outcome time point - result for each group, and the estimated effect size and its precision (such as 95% confidence interval) - for binary outcomes, presentation of both absolute and relative effect size | - A total of 200 clinical students were included in the randomized trial, comprising 100 students from the 2022 cohort and 100 from the 2023 cohort. Within each cohort, participants were equally allocated to the experimental group (n =50, drawing + HQA method) and control group (n =50, traditional lecture-dissection). For the Anatomical Structure Cognition Test, all 200 participants were analyzed (100% data recovery). For the Clinical Integration Ability Assessment, 198 participants were included in the analysis (99% recovery rate; 2 cases excluded due to incomplete submissions). The pre-study questionnaire survey, which was separate from the main trial, yielded 224 valid responses from students who had previously completed the regional anatomy course. - For all primary and secondary outcomes, data were available from the 200 participants randomized across both cohorts. At the immediate post-intervention time point, complete data were available for all participants on the Anatomical Structure Cognition Test (200/200, 100% recovery) and Clinical Integration Ability Assessment (198/200, 99.0% recovery). The Long-term Knowledge Retention Test, administered one month post-intervention, was distributed to all 200 participants via online platform. Data from the Psychological Burden Scale (PSS-10) were collected pre- and post-intervention for both groups. Participation Records and Chapter Cognition Satisfaction questionnaires were completed by both groups after each class throughout the 16-week intervention period, with all 200 participants contributing data. - A total of 200 participants were included in the analysis (100 per cohort, with 50 randomized to each group). Complete data were available at all outcome time points: the Anatomical Structure Cognition Test captured all 200 participants (100% recovery), while the Clinical Integration Ability Assessment included 198 participants (99% recovery). For continuous outcomes, the experimental group (drawing + HQA) achieved significantly higher mean scores than the control group on the practical assessment (84.2 ± 4.8 vs 74.6 ± 6.1; mean difference = 9.6 points, 95% CI: 7.8-11.4), theoretical examination (77.8 ± 8.9 vs 70.1 ± 11.2; mean difference = 7.7 points, 95% CI: 5.2-10.2), and long-term retention test at one month (81.5 ± 6.7 vs 72.3 ± 9.1; mean difference = 9.2 points, 95% CI: 7.1-11.3). For binary outcomes like case analysis accuracy, the experimental group demonstrated superior performance (79.1% vs 68.9%), representing a risk difference of 10.2% (95% CI: 6.8%-13.6%). Secondary outcomes similarly favored the experimental group: satisfaction scores (4.11 ± 0.42 vs 3.86 ± 0.51; mean difference = 0.25, 95% CI: 0.18-0.32), participation scores (4.00 ± 0.38 vs 3.91 ± 0.45; mean difference = 0.09, 95% CI: 0.02-0.16), and psychological burden reduction (4.2 ± 2.1 vs 1.8 ± 1.9 points; mean difference in change = 2.4, 95% CI: 1.8-3.0), all achieving statistical significance at P<0.05. - For binary outcomes, complete data were available from 198 participants in the Clinical Integration Ability Assessment (Table 1) and 200 participants in the Specimen Identification Test (Table 2). In the Clinical Integration Assessment, Item 1 was correctly answered by 34 of 43 participants (79.07%) in the experimental group versus 35 of 50 (70.00%) in the control group, yielding an absolute risk difference of 9.07 percentage points (95% CI: -5.2% to 23.3%) and a relative risk of 1.13 (95% CI: 0.92-1.38). For Item 2, accuracy was 33/43 (76.74%) vs 30/50 (60.00%), representing an absolute risk difference of 16.74 percentage points (95% CI: 0.8% to 32.7%) and a relative risk of 1.28 (95% CI: 1.01-1.62). In the Specimen Identification Test (Table 2), Item 1 showed 22/43 correct (51.16%) in the experimental group vs 20/51 (39.23%) in controls, with an absolute risk difference of 11.93 percentage points (95% CI: -5.1% to 28.9%) and a relative risk of 1.30 (95% CI: 0.85-2.00). All binary outcomes are presented with both absolute and relative effect sizes to provide comprehensive estimates of intervention impact. |
| Harms | 27 | All harms or unintended events in each group | No serious adverse psychological events occurred |
| Ancillary analyses | 28 | Any other analyses performed, including subgroup and sensitivity analyses, distinguishing pre-specified from post-hoc | No subgroup analysis was conducted. |
| **Discussion** | | |  |
| Interpretation | 29 | Interpretation consistent with results, balancing benefits and harms, and considering other relevant evidence | This study's findings carry substantial theoretical and practical implications for medical education. Theoretically, it provides empirical validation of cognitive load theory by demonstrating that the drawing+HQA model reduces perceived learning pressure from 24.62% to 13.95% while quantifying dual coding theory's long-term benefits through a 17.33-point memory retention advantage at one month. Practically, the intervention's zero-equipment dependency and stable effectiveness across two cohorts (P>0.05) offer a scalable, resource-efficient solution for anatomy education, particularly in resource-limited settings. The standardized "Drawing + HQA Task Guidance Sheet" provides an immediately transferable assessment tool. However, limitations include lack of blinding introducing potential Hawthorne effects, unclear clinical translation of the 9-10 point gains, reliance on indirect cognitive load measurement via PSS-10, and unaddressed teacher training costs. Future research should incorporate neuroimaging to elucidate mechanisms, qualitative methods to explore student experiences, and investigate integration with AR/VR technologies for enhanced spatial cognition. |
| Limitations | 30 | Trial limitations, addressing sources of potential bias, imprecision, generalisability, and, if relevant, multiplicity of analyses | There may be a selection bias for student voluntariness |

*We strongly recommend reading this statement in conjunction with the CONSORT 2025 Explanation and Elaboration and/or the CONSORT 2025 Expanded Checklist for important clarifications on all the items. We also recommend reading relevant CONSORT extensions. See [www.consort-spirit.org](http://www.consort-spirit.org).

Citation: Hopewell S, Chan AW, Collins GS, Hróbjartsson A, Moher D, Schulz KF, et al. CONSORT 2025 Statement: updated guideline for reporting randomised trials. BMJ. 2025; 388:e081123. <https://dx.doi.org/10.1136/bmj-2024-081123>.

© 2025 Hopewell et al. This is an Open Access article distributed under the terms of the Creative Commons Attribution License (<https://creativecommons.org/licenses/by/4.0/>), which permits unrestricted use, distribution, and reproduction in any medium, provided the original work is properly cited.
